# Supplementary material for: Direct synthesis of sulfonated azacalixarenes in water
Source: Royal Society of Chemistry journal article supplement (doi:10.1039/b911631a), 2009-01-01
Supplement: b911631a.pdf [file b911631a.pdf]

## Direct synthesis of sulfonated azacalixarenes in water

Jonathan Clayden,<sup>\*a</sup> Stephen J. M. Rowbottom,<sup>a</sup> Warren J. Ebenezer<sup>b</sup> and Michael G. Hutchings<sup>b</sup>

### HPLC traces of compounds made

24a

=====  
HP1100 HPLC (Lims 0731) Textile Colours Research Laboratories  
=====

Sample Name: H 012c 10.2mg  
Data File name: C:\HPCHEM\1\DATA\095-0301.D  
Method name: C:\HPLCME~1\1DINKYKJ.M  
data acquired by:  
on: 13-May-05  
vial: 95

SR/02/012c.

24a

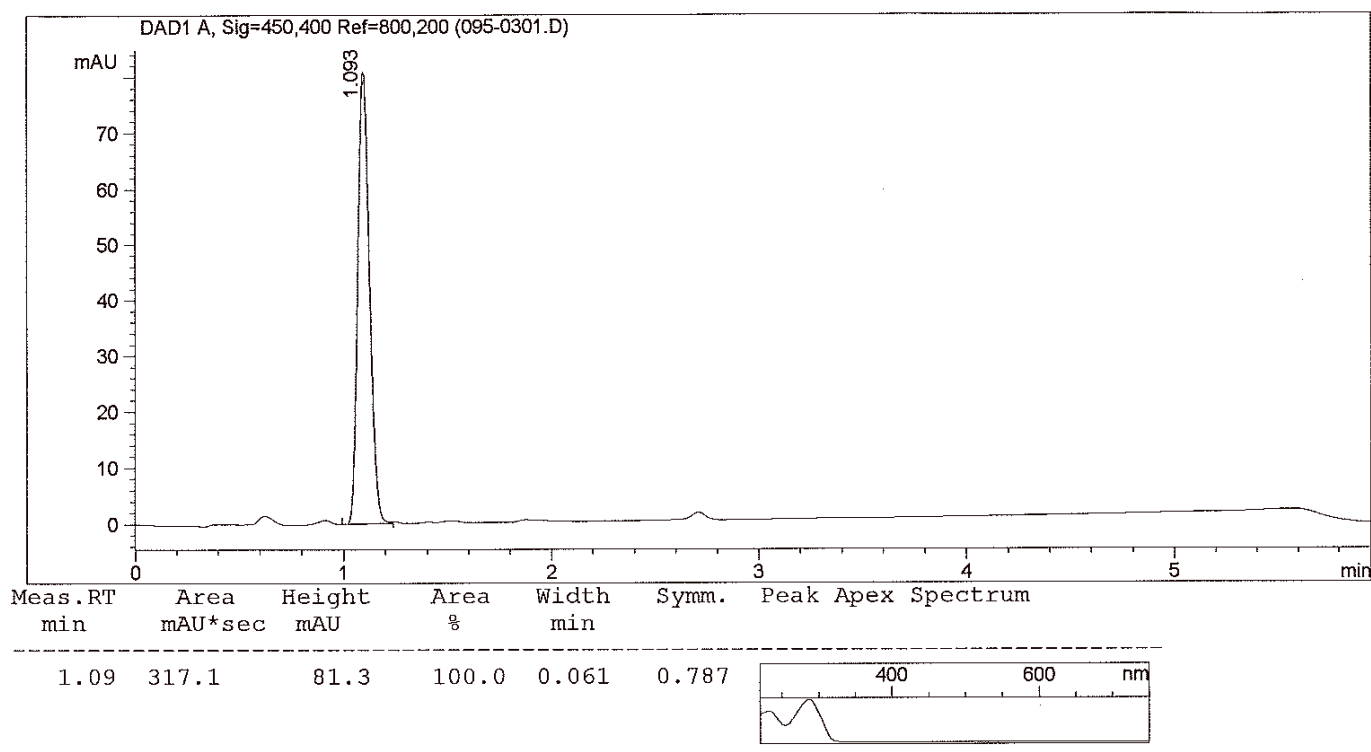

24b

HP1100 HPLC (Lims 0731) Textile Colours Research Laboratories

Sample Name: 02/021  
Data File name: C:\HPCHEM\1\DATA\078-0801.D  
Method name: C:\HPLCME~1\1DINKYKJ.M  
data acquired by:  
on: 07-Jun-05  
vial: 78

24b

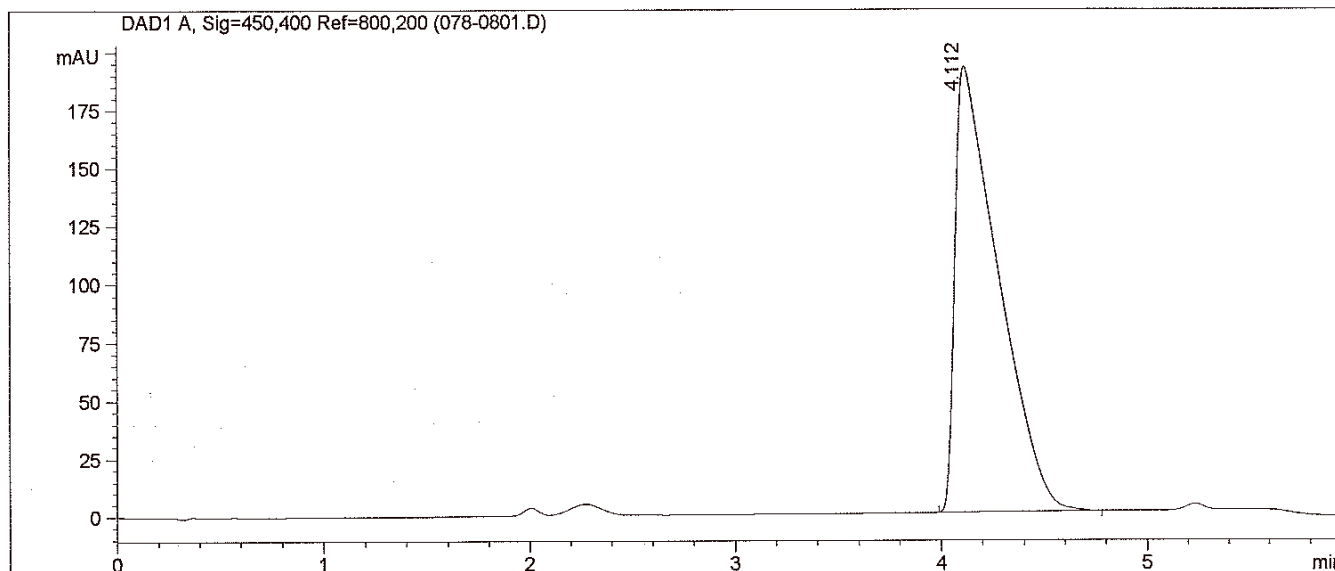

| Meas. RT | Area    | Height | Area | Width | Symm. | Peak Apex Spectrum |
|----------|---------|--------|------|-------|-------|--------------------|
| min      | mAU*sec | mAU    | %    | min   |       |                    |

|      |        |       |       |       |       |  |
|------|--------|-------|-------|-------|-------|--|
| 4.11 | 2783.3 | 192.1 | 100.0 | 0.203 | 0.247 |  |
|------|--------|-------|-------|-------|-------|--|

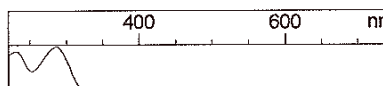

24c

HP1100 HPLC (Lims 0731) Textile Colours Research Laboratories

Sample Name: 01/92 screen (a)  
Data File name: C:\HPCHEM\1\DATA\087-0801.D  
Method name: C:\HPLCME~1\1DINKYKJ.M  
data acquired by:  
on: 20-Apr-05  
vial: 87

yield = 1.94g.

24c

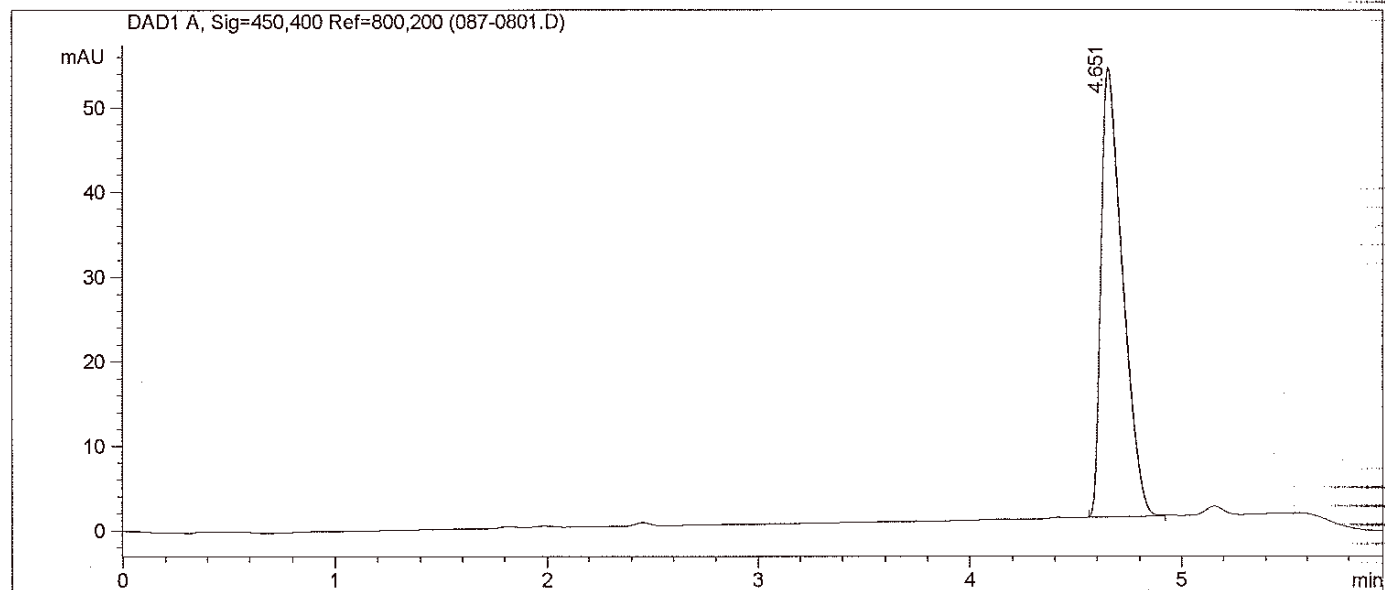

| Meas. RT | Area    | Height | Area | Width | Symm. | Peak Apex | Spectrum |
|----------|---------|--------|------|-------|-------|-----------|----------|
| min      | mAU*sec | mAU    | %    | min   |       |           |          |

|      |       |      |       |       |       |  |  |
|------|-------|------|-------|-------|-------|--|--|
| 4.65 | 379.3 | 53.3 | 100.0 | 0.105 | 0.447 |  |  |
|------|-------|------|-------|-------|-------|--|--|

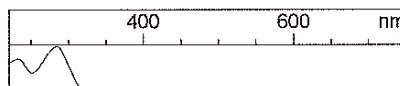

24d

=====  
HP1100 HPLC (Lims 0731) Textile Colours Research Laboratories  
=====

Sample Name: NHMe solid  
Data File name: C:\HPCHEM\1\DATA\083-0201.D  
Method name: C:\HPLCME~1\1DINKYKJ.M  
data acquired by:  
on: 02-Jun-05  
vial: 83

24d

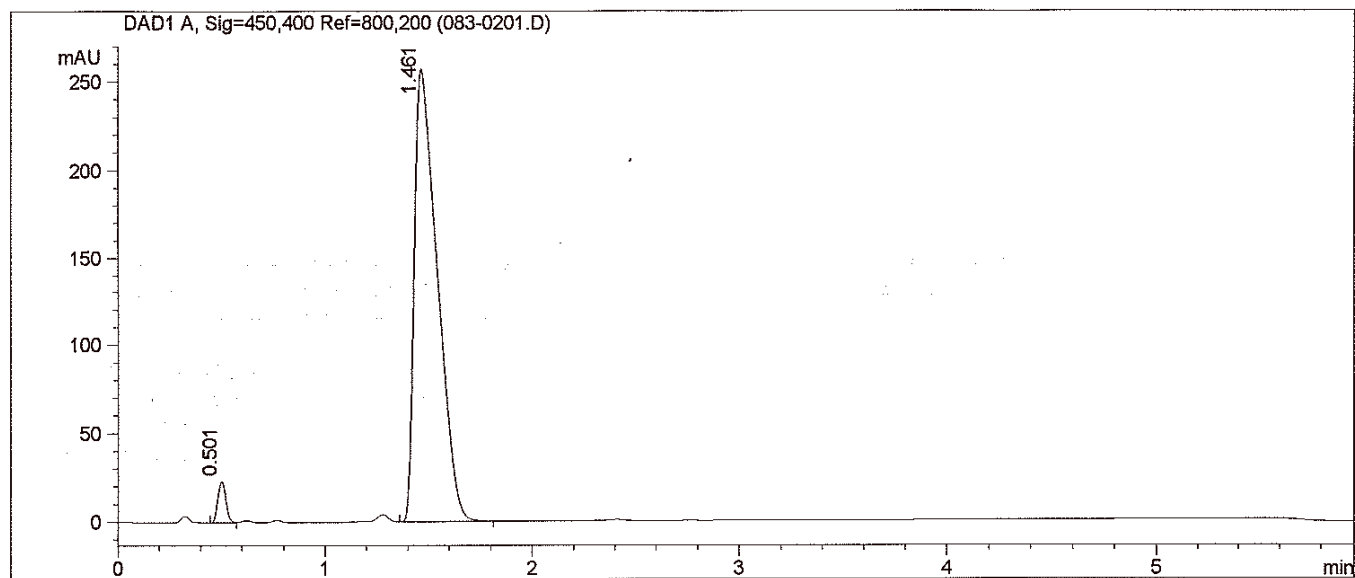

| Meas. RT<br>min | Area<br>mAU*sec | Height<br>mAU | Area<br>% | Width<br>min | Symm. | Peak Apex Spectrum |
|-----------------|-----------------|---------------|-----------|--------------|-------|--------------------|
|-----------------|-----------------|---------------|-----------|--------------|-------|--------------------|

|      |        |       |      |       |       |  |
|------|--------|-------|------|-------|-------|--|
| 0.50 | 62.7   | 23.2  | 3.1  | 0.044 | 0.916 |  |
| 1.46 | 1978.4 | 258.1 | 96.9 | 0.119 | 0.385 |  |

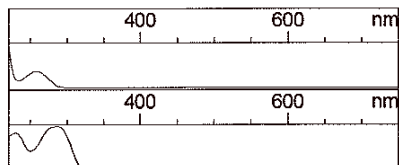

24e

=====  
HP1100 HPLC (Lims 0731) Textile Colours Research Laboratories  
=====

Sample Name: 02/001 ppt *solid (c)* ✓  
Data File name: C:\HPCHEM\1\DATA\062-0201.D  
Method name: C:\HPLCME~1\1DINKYKJ.M  
data acquired by:  
on: 28-Apr-05  
vial: 62

24e

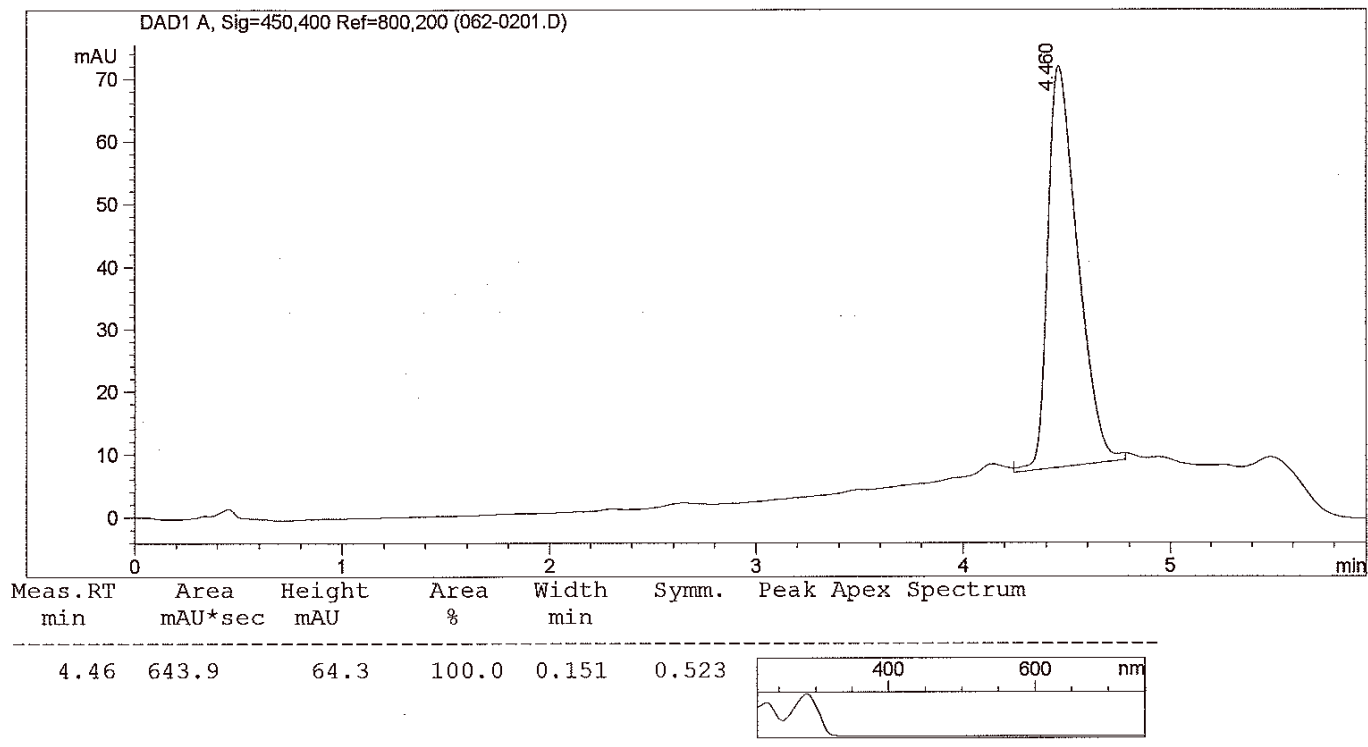

24f

HP1100 HPLC (Lims 0731) Textile Colours Research Laboratories

Sample Name: 02/3(2) solid  
Data File name: C:\HPCHEM\1\DATA\081-0101.D  
Method name: C:\HPLCME~1\1DINKYKJ.M  
data acquired by:  
on: 20-Apr-05  
vial: 81

yield = 0.566g

24f

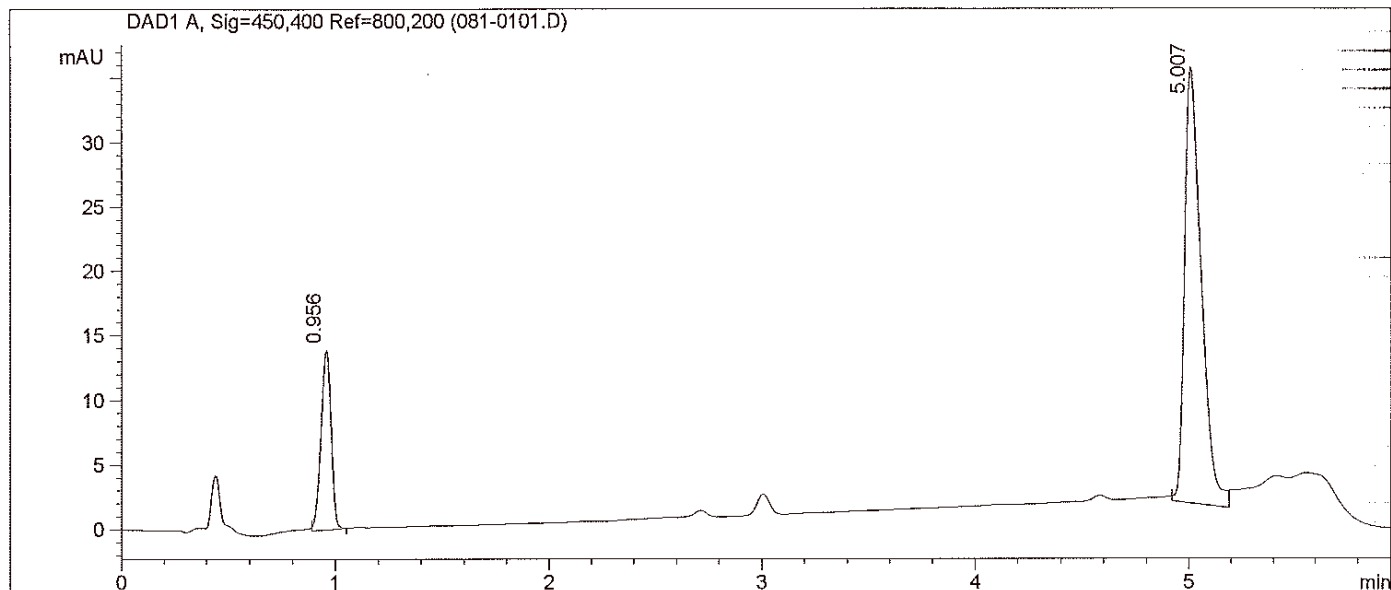

| Meas. RT<br>min | Area<br>mAU*sec | Height<br>mAU | Area<br>% | Width<br>min | Symm. | Peak Apex Spectrum |
|-----------------|-----------------|---------------|-----------|--------------|-------|--------------------|
|-----------------|-----------------|---------------|-----------|--------------|-------|--------------------|

|      |      |      |      |       |       |  |
|------|------|------|------|-------|-------|--|
| 0.96 | 46.2 | 14.0 | 20.0 | 0.053 | 1.066 |  |
|------|------|------|------|-------|-------|--|

|      |       |      |      |       |       |  |
|------|-------|------|------|-------|-------|--|
| 5.01 | 184.9 | 33.9 | 80.0 | 0.082 | 0.543 |  |
|------|-------|------|------|-------|-------|--|

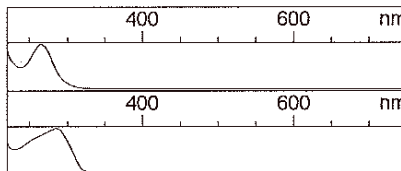

25a

HP1100 HPLC (Lims 0731) Textile Colours Research Laboratories

25a

Sample Name: SR/01/018D solid isolated from RM.  
Data File name: C:\HPCHEM\1\DATA\094-0101.D  
Method name: C:\HPLCME~1\1DINKYKJ.M  
data acquired by:  
on: 21-Oct-04  
vial: 94

Sampling:

Solid dissolved in H<sub>2</sub>O with a  
couple of drops of base (2N Na<sub>2</sub>CO<sub>3</sub>).

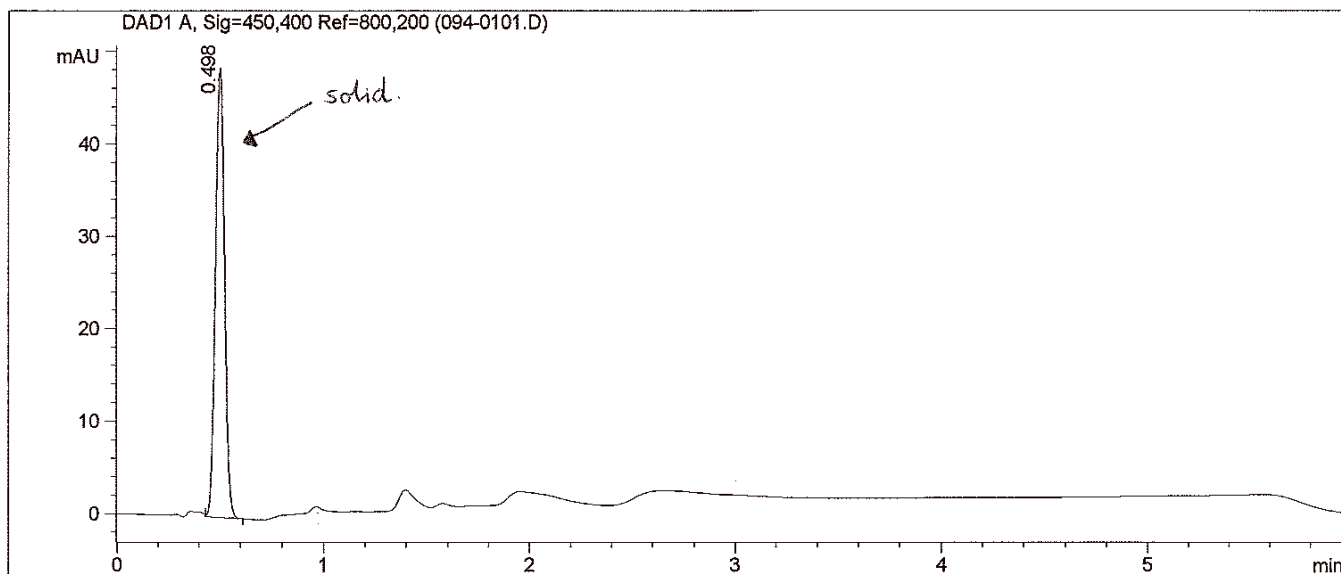

| Meas. RT | Area    | Height | Area | Width | Symm. | Peak Apex Spectrum |
|----------|---------|--------|------|-------|-------|--------------------|
| min      | mAU*sec | mAU    | %    | min   |       |                    |

|        |      |       |      |       |       |       |
|--------|------|-------|------|-------|-------|-------|
| solid. | 0.50 | 148.9 | 48.9 | 100.0 | 0.050 | 0.930 |
|--------|------|-------|------|-------|-------|-------|

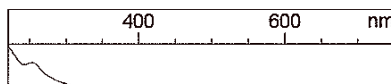

25c

HP1100 HPLC (Lims 0731) Textile Colours Research Laboratories

25c

✓

Sample Name: 049a  
Data File name: C:\HPCHEM\1\DATA\081-0202.D  
Method name: C:\HPLCME~1\1DINKYKJ.M  
data acquired by:  
on: 20-Jul-05  
vial: 81

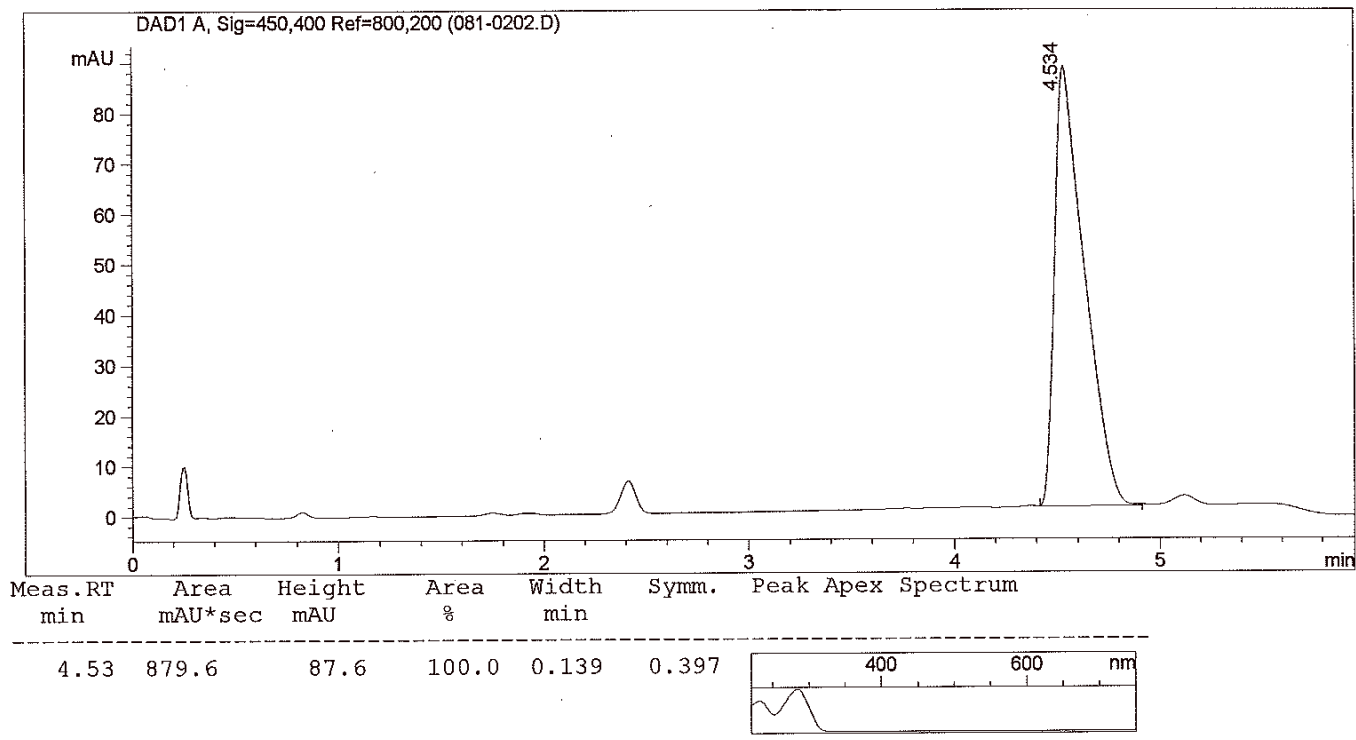



26a

26a

HP1100 HPLC (Lims 0731) Textile Colours Research Laboratories

Sample Name: 037 solid prod  
Data File name: C:\HPCHEM\1\DATA\068-0501.D  
Method name: C:\HPLCME~1\1DINKYKJ.M  
data acquired by:  
on: 22-Nov-04  
vial: 68

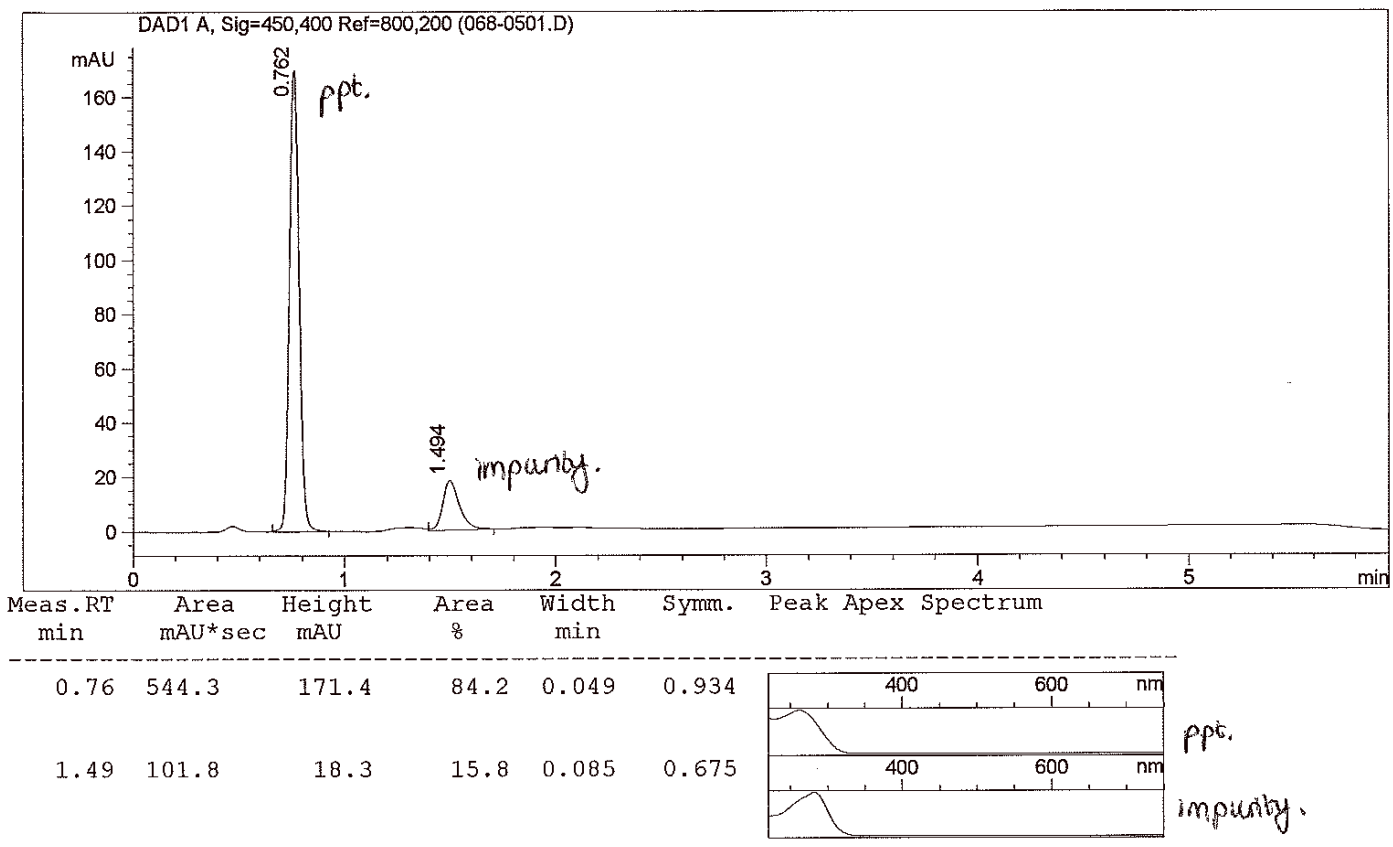

=====  
HP1100 HPLC (Lims 0731) Textile Colours Research Laboratories  
=====

Sample Name: SR/01/008C  
Data File name: C:\HPCHEM\1\DATA\092-0101.D  
Method name: C:\HPLCME~1\1DINKYKJ.M  
data acquired by:  
on: 29-Sep-04  
vial: 92

28

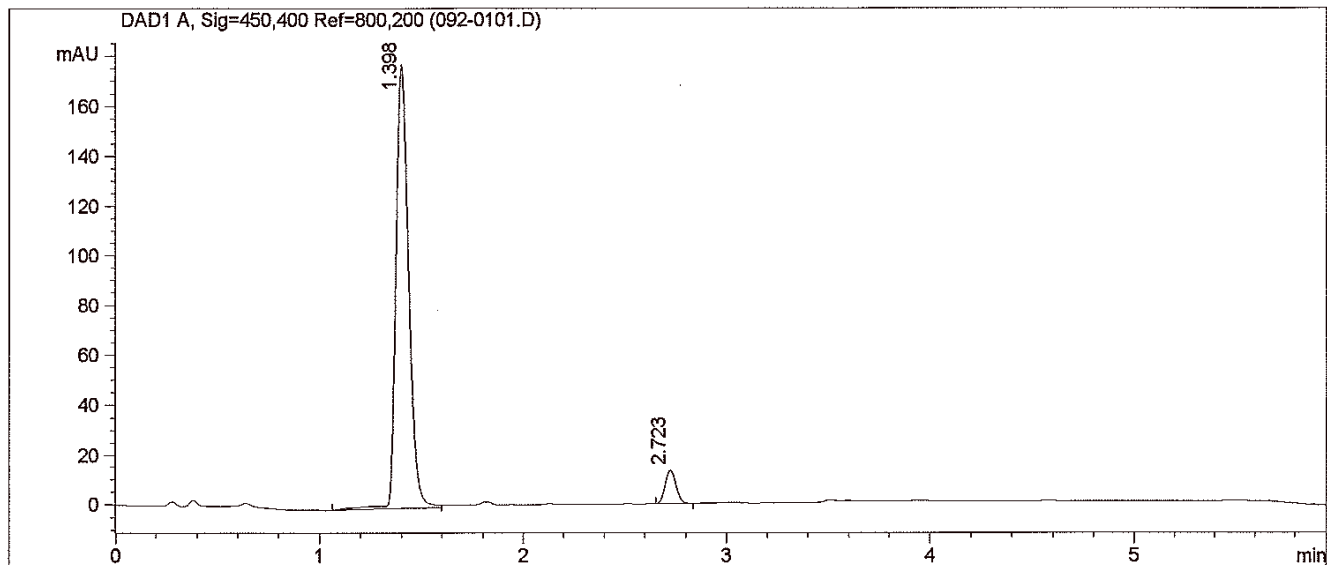

| Meas. RT<br>min | Area<br>mAU*sec | Height<br>mAU | Area<br>% | Width<br>min | Symm. | Peak Apex Spectrum |
|-----------------|-----------------|---------------|-----------|--------------|-------|--------------------|
|-----------------|-----------------|---------------|-----------|--------------|-------|--------------------|

|      |       |       |      |       |       |  |
|------|-------|-------|------|-------|-------|--|
| 1.40 | 775.0 | 178.4 | 94.0 | 0.067 | 0.705 |  |
| 2.72 | 49.4  | 13.4  | 6.0  | 0.057 | 0.874 |  |

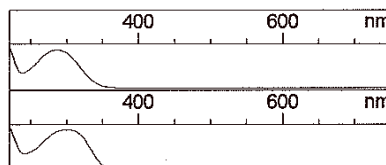

=====

HP1100 HPLC (Lims 0731) Textile Colours Research Laboratories

=====

30

Sample Name: bis  
 Data File name: C:\HPCHEM\1\DATA\074-0201.D  
 Method name: C:\HPLCME~1\1DINKYKJ.M  
 data acquired by:  
 on: 05-Sep-05  
 vial: 74

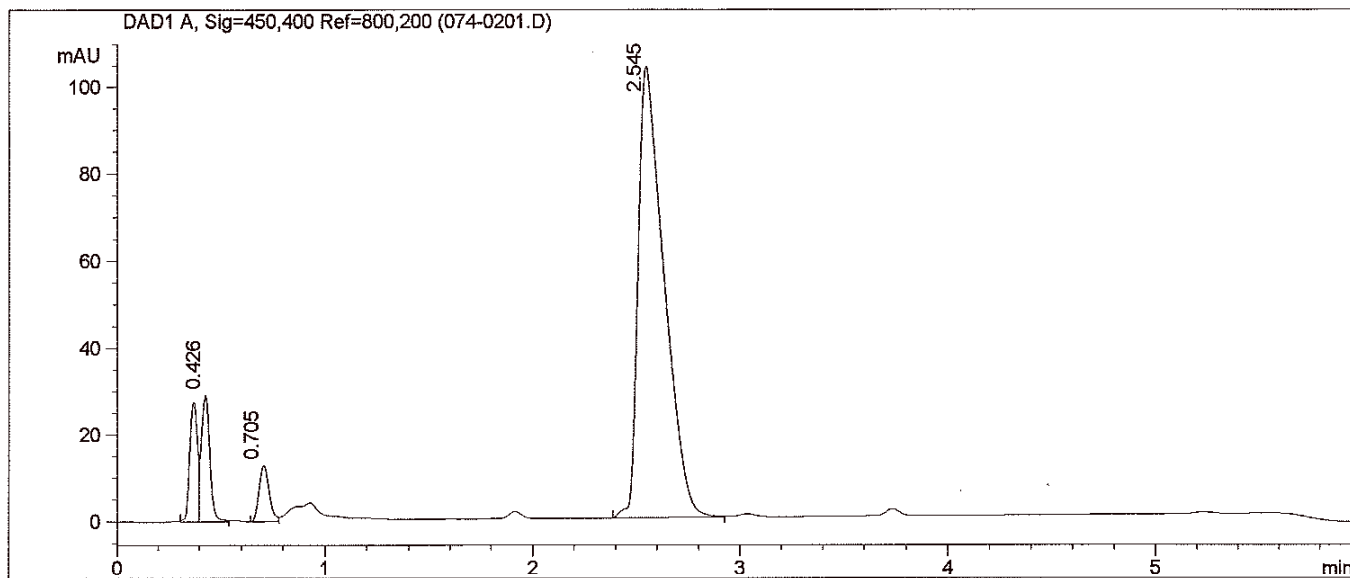

| Meas. RT<br>min | Area<br>mAU*sec | Height<br>mAU | Area<br>% | Width<br>min | Symm. | Peak Apex Spectrum |
|-----------------|-----------------|---------------|-----------|--------------|-------|--------------------|
| 0.37            | 71.1            | 27.7          | 6.5       | 0.040        | 1.087 |                    |
| 0.43            | 83.1            | 29.3          | 7.6       | 0.043        | 0.854 |                    |
| 0.71            | 43.6            | 13.0          | 4.0       | 0.053        | 0.808 |                    |
| 2.55            | 902.9           | 104.1         | 82.0      | 0.125        | 0.417 |                    |
